# Supplementary material
Source: publisher site journal article supplement (https://www.dovepress.com/article/466283)
Supplement: Supplementary file 1 [file get_supplementary_file.php]

**Supplementary Table 1. Association between sleep duration with cardiometabolic diseases among age and gender subgroups**

| **Sleep duration** | **Overall** | ***p value*** |  | **≤ 65 years** | ***p value*** | **> 65 years** | ***p valu*e** |  | **Female** | ***p value*** | **Male** | ***p value*** |
| --- | --- | --- | --- | --- | --- | --- | --- | --- | --- | --- | --- | --- |
| PR (95% CI) |  | PR (95% CI) | PR (95% CI) |  | PR (95% CI) | PR (95% CI) |
| **CMDs** |  |  |  |  |  |  |  |  |  |  |  |  |
| 6-8h | Reference |  |  | Reference |  | Reference |  |  | Reference |  | Reference |  |
| < 6h | 1.140 (1.068-1.218) | < 0.001 |  | 1.340 (1.181-1.519) | < 0.001 | 1.110 (1.027-1.200) | 0.008 |  | 1.157 (1.062-1.260) | 0.001 | 1.120 (1.011-1.242) | 0.031 |
| > 8h | 1.060 (0.961-1.169) | 0.244 |  | 0.973 (0.825-1.148) | 0.747 | 1.114 (0.986-1.258) | 0.084 |  | 1.143 (1.011-1.292) | 0.033 | 0.933 (0.792-1.098) | 0.403 |
| *P for trend* |  | 0.003 |  |  | 0.078 |  | 0.005 |  |  | 0.001 |  | 0.603 |
| **DM** |  |  |  |  |  |  |  |  |  |  |  |  |
| 6-8h | Reference |  |  | Reference |  | Reference |  |  | Reference |  | Reference |  |
| < 6h | 1.199 (1.115-1.290) | < 0.001 |  | 1.339 (1.167-1.537) | < 0.001 | 1.183 (1.085-1.291) | < 0.001 |  | 1.195 (1.087-1.314) | < 0.001 | 1.206 (1.075-1.353) | 0.001 |
| > 8h | 1.072 (0.963-1.193) | 0.205 |  | 1.000 (0.840-1.190) | 0.999 | 1.116 (0.974-1.279) | 0.115 |  | 1.169 (1.023-1.334) | 0.021 | 0.919-(0.766-1.103) | 0.363 |
| *P for trend* |  | < 0.001 |  |  | 0.069 |  | 0.001 |  |  | < 0.001 |  | 0.326 |
| **Stroke** |  |  |  |  |  |  |  |  |  |  |  |  |
| 6-8h | Reference |  |  | Reference |  | Reference |  |  | Reference |  | Reference |  |
| < 6h | 1.206 (0.959-1.517) | 0.109 |  | 1.338 (0.879-2.039) | 0.175 | 1.229 (0.931-1.622) | 0.146 |  | 1.284 (0.930-1.774) | 0.129 | 1.155 (0.835-1.599) | 0.384 |
| > 8h | 1.051 (0.718-1.538) | 0.799 |  | 0.791 (0.403-1.554) | 0.496 | 1.272 (0.800-2.021) | 0.310 |  | 1.221 (0.740-2.015) | 0.434 | 0.881 (0.489-1.587) | 0.674 |
| *P for trend* |  | 0.266 |  |  | 0.905 |  | 0.110 |  |  | 0.147 |  | 0.844 |
| **Ischemic stroke** |  |  |  |  |  |  |  |  |  |  |  |  |
| 6-8h | Reference |  |  | Reference |  | Reference |  |  | Reference |  | Reference |  |
| < 6h | 1.219 (0.952-1.561) | 0.117 |  | 1.250 (0.775-2.017) | 0.361 | 1.252 (0.932-1.683) | 0.136 |  | 1.270 (0.900-1.793) | 0.174 | 1.198 (0.839-1.709) | 0.320 |
| > 8h | 0.960 (0.627-1.470) | 0.850 |  | 0.627 (0.276-1.426) | 0.266 | 1.215 (0.736-2.006) | 0.446 |  | 1.105 (0.638-1.914) | 0.722 | 0.807 (0.410-1.589) | 0.535 |
| *P for trend* |  | 0.447 |  |  | 0.637 |  | 0.150 |  |  | 0.299 |  | 0.899 |
| **Hemorrhagic stroke** |  |  |  |  |  |  |  |  |  |  |  |  |
| 6-8h | Reference |  |  | Reference |  | Reference |  |  | Reference |  | Reference |  |
| < 6h | 1.015 (0.590-1.746) | 0.958 |  | 1.468 (0.646-3.335) | 0.359 | 0.986 (0.482-2.016) | 0.968 |  | 1.351 (0.620-2.944) | 0.449 | 0.790 (0.369-1.695) | 0.546 |
| > 8h | 1.719 (0.853-3.464) | 0.129 |  | 1.087 (0.333-3.542) | 0.890 | 2.650 (1.088-6.457) | 0.032 |  | 1.946 (0.677-5.595) | 0.217 | 1.551 (0.607-3.962) | 0.359 |
| *P for trend* |  | 0.237 |  |  | 0.574 |  | 0.127 |  |  | 0.178 |  | 0.703 |
| **CAD** |  |  |  |  |  |  |  |  |  |  |  |  |
| 6-8h | Reference |  |  | Reference |  | Reference |  |  | Reference |  | Reference |  |
| < 6h | 1.268 (1.097-1.466) | 0.001 |  | 1.458 (0.995-2.136) | 0.053 | 1.061 (0.906-1.242) | 0.463 |  | 1.410 (1.173-1.696) | < 0.001 | 1.084 (0.857-1.372) | 0.502 |
| > 8h | 1.123 (0.884-1.426) | 0.341 |  | 1.039 (0.623-1.733) | 0.884 | 1.160 (0.886-1.519) | 0.281 |  | 1.112 (0.814-1.521) | 0.504 | 1.138 (0.787-1.646) | 0.492 |
| *P for trend* |  | 0.012 |  |  | 0.329 |  | 0.227 |  |  | 0.011 |  | 0.372 |

Multivariate Poisson regression analysis was utilized in these models, and were adjusted by age (continuous variable), gender (for age subgroups), height (continuous variable), rural residents, well educated, CCVD family history, high income, smoking, physical inactivity, vegetables insufficiency, fruits consumption habit

CMDs: cardiometabolic diseases; DM: diabetes mellitus; CAD: coronary artery disease; PR: prevalence ratio. CCVD: cardiac-cerebral vascular disease

**Supplementary Table 2. Relation between sleep duration and cardiometabolic diseases among age with gender subgroups**

| **Sleep duration** | **Overall** | ***p value*** | **Younger females** | ***p value*** | **Older females** | ***p valu*e** | **Younger males** | ***p value*** | **Older males** | ***p value*** |
| --- | --- | --- | --- | --- | --- | --- | --- | --- | --- | --- |
| PR (95% CI) | PR (95% CI) | PR (95% CI) | PR (95% CI) | PR (95% CI) |
| **CMDs** |  |  |  |  |  |  |  |  |  |  |
| 6-8h | Reference |  | Reference |  | Reference |  | Reference |  | Reference |  |
| <6h | 1.140 (1.068-1.218) | < 0.001 | 1.344 (1.145-1.578) | < 0.001 | 1.132 (1.022-1.254) | 0.018 | 1.339 (1.092-1.642) | 0.005 | 1.086 (0.963-1.224) | 0.179 |
| >8h | 1.060 (0.961-1.169) | 0.244 | 1.104 (0.903-1.349) | 0.335 | 1.169 (1.001-1.365) | 0.049 | 0.769 (0.575-1.028) | 0.077 | 1.025 (0.841-1.249) | 0.808 |
| *P for trend* |  | 0.003 |  | 0.015 |  | 0.005 |  | 0.789 |  | 0.341 |
| **DM** |  |  |  |  |  |  |  |  |  |  |
| 6-8h | Reference |  | Reference |  | Reference |  | Reference |  | Reference |  |
| <6h | 1.199 (1.115-1.290) | < 0.001 | 1.340 (1.125-1.595) | 0.001 | 1.182 (1.056-1.324) | 0.004 | 1.344 (1.074-1.681) | 0.010 | 1.188 (1.038-1.359) | 0.012 |
| >8h | 1.072 (0.963-1.193) | 0.205 | 1.133 (0.917-1.401) | 0.248 | 1.192 (1.006-1.414) | 0.043 | 0.796 (0.587-1.079) | 0.141 | 0.992 (0.790-1.246) | 0.947 |
| *P for trend* |  | < 0.001 |  | 0.015 |  | 0.002 |  | 0.872 |  | 0.170 |
| **Stroke** |  |  |  |  |  |  |  |  |  |  |
| 6-8h | Reference |  | Reference |  | Reference |  | Reference |  | Reference |  |
| <6h | 1.206 (0.959-1.517) | 0.109 | 1.353 (0.768-2.386) | 0.295 | 1.333 (0.889-1.999) | 0.164 | 1.305 (0.695-2.449) | 0.408 | 1.184 (0.807-1.736) | 0.388 |
| >8h | 1.051 (0.718-1.538) | 0.799 | 1.101 (0.506-2.394) | 0.808 | 1.332 (0.691-2.568) | 0.392 | 0.388 (0.095-1.588) | 0.188 | 1.226 (0.636-2.364) | 0.542 |
| *P for trend* |  | 0.266 |  | 0.483 |  | 0.146 |  | 0.493 |  | 0.343 |
| **Ischemic stroke** |  |  |  |  |  |  |  |  |  |  |
| 6-8h | Reference |  | Reference |  | Reference |  | Reference |  | Reference |  |
| <6h | 1.219 (0.952-1.561) | 0.117 | 1.249 (0.670-2.327) | 0.484 | 1.341 (0.873-2.061) | 0.180 | 1.239 (0.586-2.621) | 0.575 | 1.216 (0.808-1.832) | 0.348 |
| >8h | 0.960 (0.627-1.470) | 0.850 | 0.861 (0.346-2.142) | 0.748 | 1.320 (0.661-2.635) | 0.432 | 0.264 (0.036-1.915) | 0.188 | 1.127 (0.543-2.339) | 0.748 |
| *P for trend* |  | 0.447 |  | 0.945 |  | 0.170 |  | 0.388 |  | 0.427 |
| **Hemorrhagic stroke** |  |  |  |  |  |  |  |  |  |  |
| 6-8h | Reference |  | Reference |  | Reference |  | Reference |  | Reference |  |
| <6h | 1.015 (0.590-1.746) | 0.958 | 1.721 (0.532-5.564) | 0.365 | 1.280 (0.444-3.691) | 0.648 | 1.348 (0.425-4.271) | 0.612 | 0.789 (0.294-2.118) | 0.637 |
| >8h | 1.719 (0.853-3.464) | 0.129 | 1.634 (0.374-7.146) | 0.514 | 2.469 (0.533-11.436) | 0.248 | 0.624 (0.083-4.685) | 0.646 | 2.796 (0.929-8.417) | 0.067 |
| *P for trend* |  | 0.237 |  | 0.338 |  | 0.284 |  | 0.896 |  | 0.271 |
| **CAD** |  |  |  |  |  |  |  |  |  |  |
| 6-8h | Reference |  | Reference |  | Reference |  | Reference |  | Reference |  |
| <6h | 1.268 (1.097-1.466) | 0.001 | 1.059 (0.625-1.795) | 0.831 | 0.907 (0.723-1.137) | 0.397 | 1.349 (0.731-2.490) | 0.338 | 0.876 (0.676-1.134) | 0.313 |
| >8h | 1.123 (0.884-1.426) | 0.341 | 1.300 (.714-2.368) | 0.391 | 1.030 (0.712-1.489) | 0.877 | 0.797 (0.290-2.193) | 0.660 | 1.193 (0.801-1.778) | 0.386 |
| *P for trend* |  | 0.012 |  | 0.413 |  | 0.696 |  | 0.892 |  | 0.318 |

The demarcation between the younger and older age was set at 65 years. Multivariate Poisson regression analysis was utilized in these models, and were adjusted by age (continuous variable), height (continuous variable), rural residents, well educated, CCVD family history, high income, smoking, physical inactivity, vegetables insufficiency, fruits consumption habit

CMDs: cardiometabolic diseases; DM: diabetes mellitus; CAD: coronary artery disease; PR: prevalence ratio. CCVD: cardiac-cerebral vascular disease

**
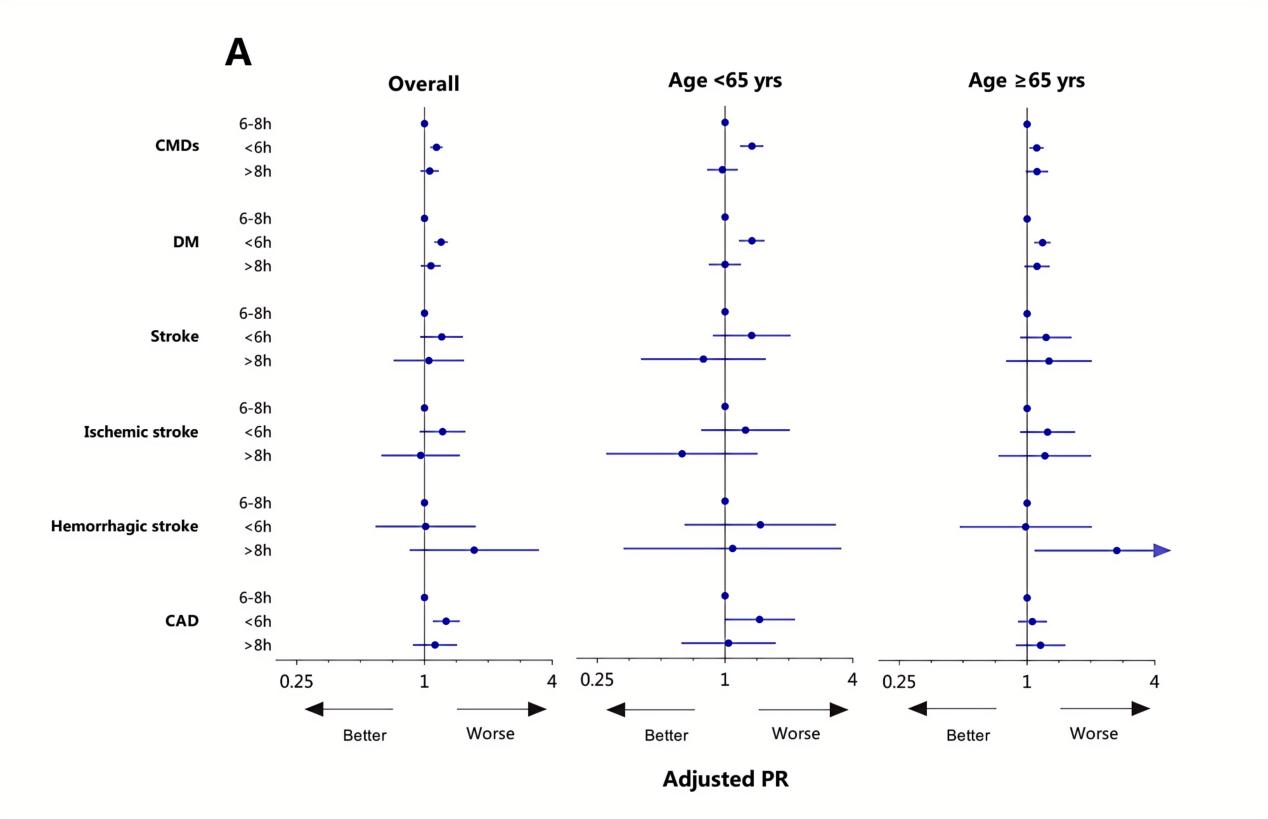
**

**
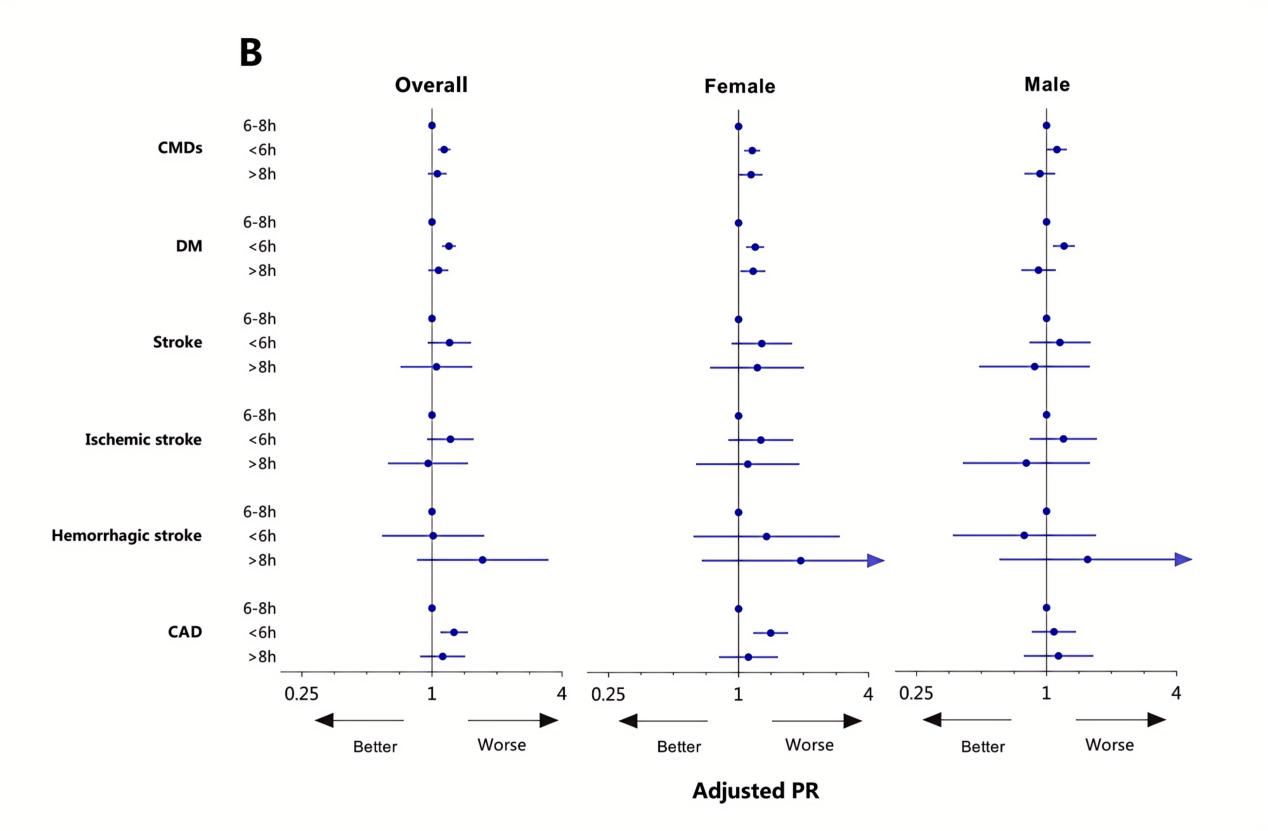
**

**
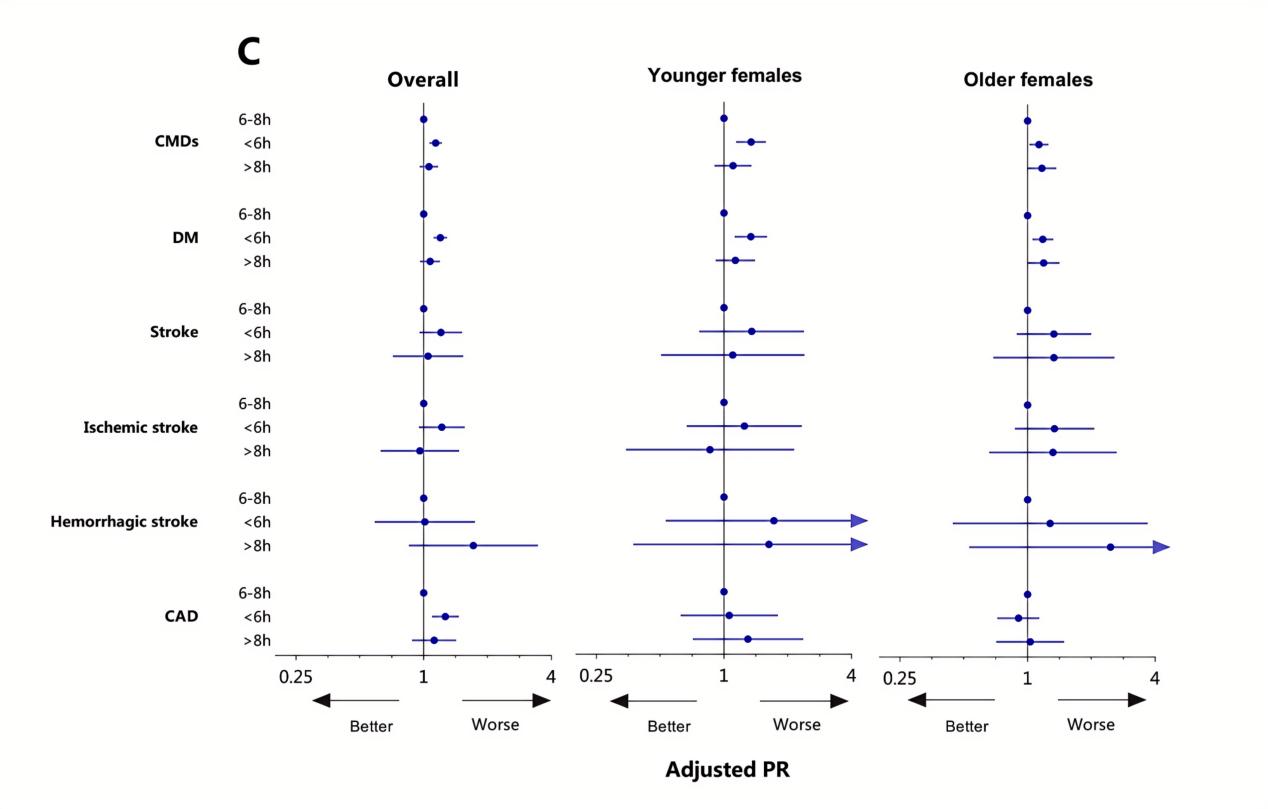

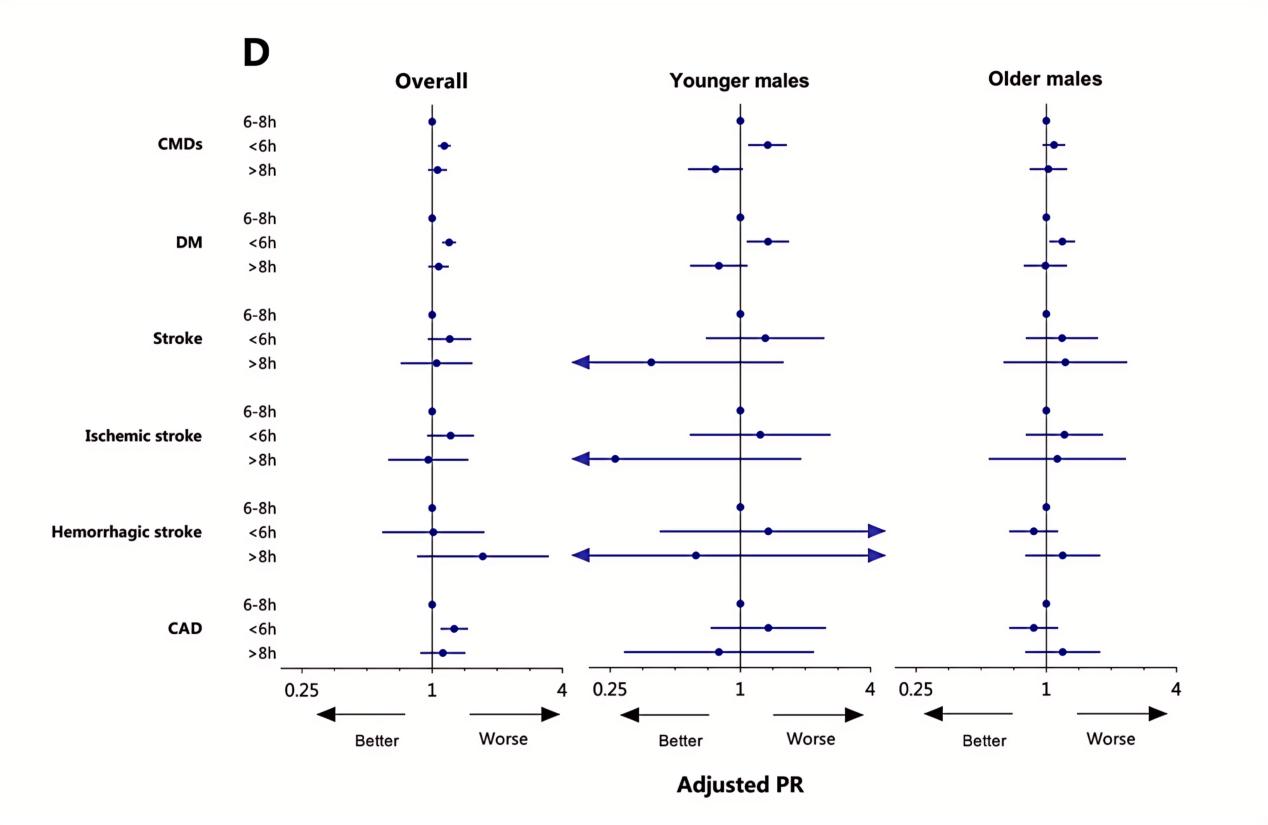
**

**Supplementary Figure 1**. Multivariate adjusted PR values for the association between sleep duration and cardiometabolic diseases and its components were analyzed within age subgroups (**A**), gender subgroups (**B**) and age with gender subgroups (**C, D**).

The demarcation between the younger and older age was set at 65 years. Multivariate Poisson regression models were utilized in these models, and were adjusted by age (continuous variable), gender (for **A, C, D**), height (continuous variable), rural residents, well educated, CCVD family history, high income, smoking, physical inactivity, vegetables insufficiency, fruits consumption habit.

CMDs: cardiometabolic diseases; DM: diabetes mellitus; CAD: coronary artery disease; PR: prevalence ratio. CCVD: cardiac-cerebral vascular disease.
